# Supplementary material for: Recyclable iron(ii) caffeine-derived ionic salt catalyst in the Diels–Alder reaction of cyclopentadiene and α,β-unsaturated N-acyl-oxazolidinones in dimethyl carbonate
Source: Royal Society of Chemistry journal article supplement (doi:10.1039/c9ra04098f), 2019-01-01
Supplement: c9ra04098f1.pdf [file c9ra04098f1.pdf]

Supplementary Information for

**Recyclable Iron(II) Caffeine-derived Ionic Salt Catalyst in the  
Diels-Alder Reaction of Cyclopentadiene and  $\alpha,\beta$ -Unsaturated  
N-Acyl-oxazolidinones in Dimethyl Carbonate**

Di Meng, Dazhi Li, and Thierry Ollevier\*

*Département de chimie, Université Laval, 1045 avenue de la Médecine,  
Québec, QC, G1V 0A6, Canada*

*E-mail: thierry.ollevier@chm.ulaval.ca*

**Table of content**

|                                                                                                     |    |
|-----------------------------------------------------------------------------------------------------|----|
| <b>1. Interaction between xanthinium and Fe(OTf)<sub>2</sub></b> .....                              | 2  |
| <b>2. <sup>1</sup>H and <sup>19</sup>F NMR of C1 before and after the catalytic reactions</b> ..... | 8  |
| <b>3. Comparison between C1–C4</b> .....                                                            | 9  |
| <b>4. Copies of <sup>1</sup>H NMR and <sup>13</sup>C NMR spectra of the products</b> .....          | 11 |
| <b>5. References</b> .....                                                                          | 23 |

## 1. Interaction between xanthinium and Fe(OTf)<sub>2</sub>

As far as we are concerned, there has been no study of the interaction between xanthinium and Fe(OTf)<sub>2</sub> by spectra reported to date. For this purpose, the interaction between xanthinium and Fe(OTf)<sub>2</sub> was studied by using UV-Vis, FTIR, <sup>1</sup>H, <sup>13</sup>C and <sup>19</sup>F NMR, and HRMS. The UV-Vis spectra of xanthinium are shown in Figure S1. The xanthinium possesses two main absorbance bands at 204 nm (absorption coefficient  $1.3 \times 10^4$ ,  $\pi$ - $\pi^*$  transition) and 268 nm (absorption coefficient  $7.0 \times 10^3$ , n- $\pi^*$  transition), and no absorbance in the range of 300–800 nm. Upon addition of different equivalents of Fe(OTf)<sub>2</sub> (0.2 to 10 equiv.) to the solution, the UV-Vis spectra of xanthinium did not show significant changes neither at 204 nm nor 268 nm, providing no clear trend of change. Since the UV-Vis spectra must be recorded at low concentration ( $5 \times 10^{-5}$  mol/L), the interaction between xanthinium and Fe(OTf)<sub>2</sub> was further diminished, and finally not detectable by the spectra. Thus, the UV-Vis spectra was considered not suitable for the study of the interaction between xanthinium and Fe(OTf)<sub>2</sub>. It is very important to note that, in a specific type of spectrum, no observation of changes does not necessarily mean no interaction between two species, because the spectrum technique might be not sensitive enough to detect the changes.

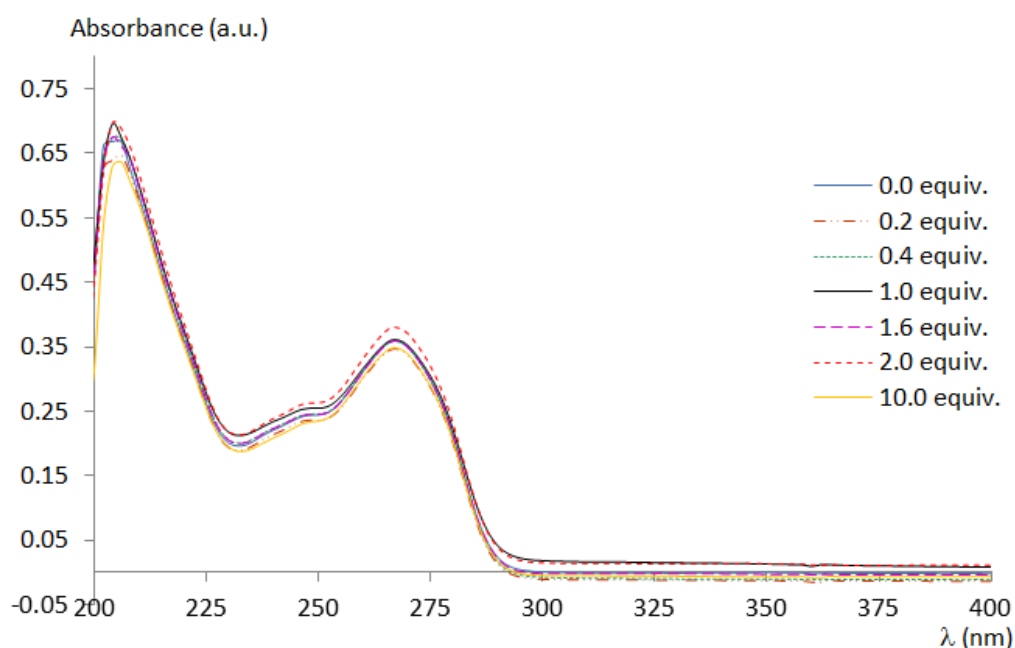

**Figure S1.** UV-Vis spectra of xanthinium **C1** ( $5 \times 10^{-5}$  mol/L in EtOH) upon addition of different equivalents of Fe(OTf)<sub>2</sub> at 25 °C. The corresponding Fe(OTf)<sub>2</sub> solution without **C1** was used as reference.

In addition to UV-Vis spectra, FTIR spectra were studied. The FTIR spectrum of xanthinium of **C1** shows two carbonyl signals at 1723 cm<sup>-1</sup> and 1683 cm<sup>-1</sup> (symmetric and antisymmetric stretching). After mixing with Fe(OTf)<sub>2</sub>, the signals shifted to 1726 cm<sup>-1</sup> and 1676 cm<sup>-1</sup>, respectively (Figure S2). The peaks at 1194 (C–F stretching, very strong), 622 and 608 cm<sup>-1</sup> also shifted to 1209, 641 and 618 cm<sup>-1</sup>, respectively. On the other hand, the signal intensity at 1140 cm<sup>-1</sup> increased, while the signal at 855 cm<sup>-1</sup> almost disappeared. The changes of C=O and C–F stretching frequencies (corresponding to xanthinium cation and N(SO<sub>2</sub>CF<sub>3</sub>)<sub>2</sub><sup>-</sup> anion, respectively) in FTIR spectra indicated that interactions between xanthinium and Fe(OTf)<sub>2</sub> may involve coordination of Fe(II) to carbonyl groups.

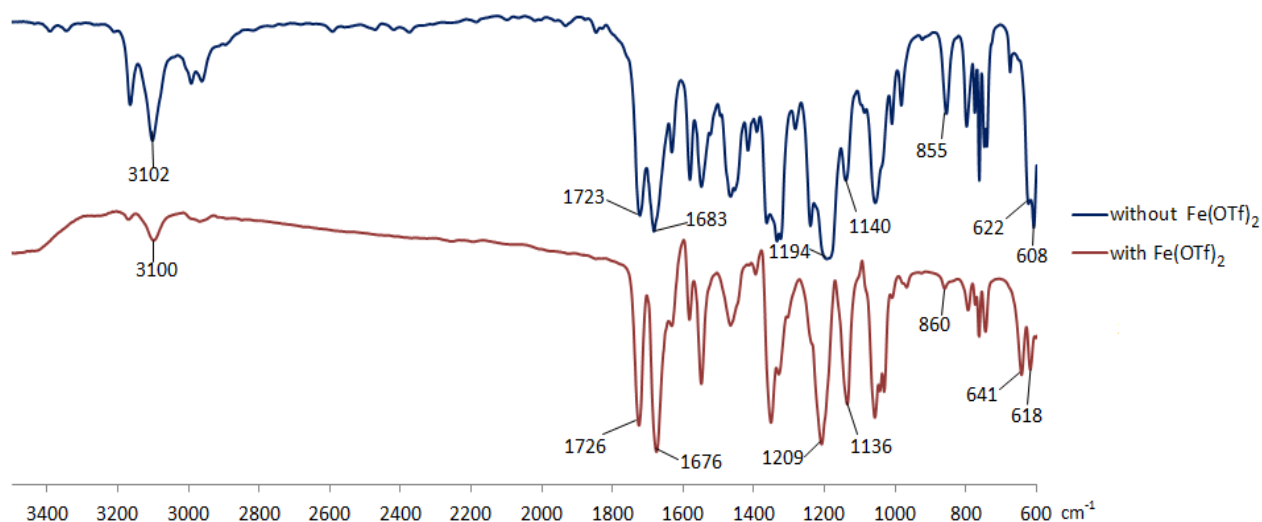

**Figure S2.** FTIR spectra of xanthinium of **C1** without the presence of Fe(OTf)<sub>2</sub> and in the presence of Fe(OTf)<sub>2</sub> (1.0 equiv., the signals of Fe(OTf)<sub>2</sub> have been subtracted from the spectra).

Subsequently, the NMR spectra were used to study the interaction between xanthinium and Fe(OTf)<sub>2</sub> (Figure S3, S4 and S5). As shown in Figure S3, upon addition of additional equivalents of Fe(OTf)<sub>2</sub> to xanthinium, the chemical shifts of <sup>1</sup>H NMR showed no obvious changes. This indicated that the interaction with Fe(OTf)<sub>2</sub> in solution did not cause any significant changes of the <sup>1</sup>H magnetic environment in the xanthinium. Thus, <sup>1</sup>H NMR was not suitable for the study of the interaction between xanthinium and Fe(OTf)<sub>2</sub>. In addition, <sup>13</sup>C NMR was run (Figure S4). Upon addition of Fe(OTf)<sub>2</sub>, all signals of xanthinium shifted upfield by 1.21–1.46 ppm (more electron enriched). Notably, the signal-to-noise ratio of carbon C3 and C6 increased, while the signals of C8 and C10 decreased.

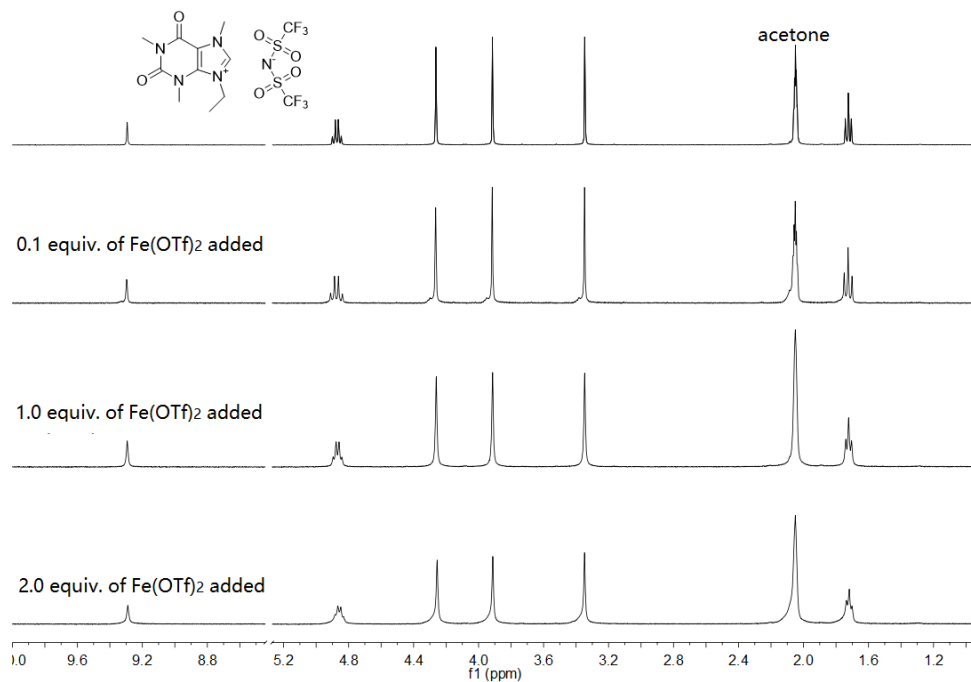

**Figure S3.**  $^1\text{H}$  NMR spectra of xanthinium (5 mg/mL in  $(\text{CD}_3)_2\text{CO}$ , 400 MHz) upon addition of different equivalents of  $\text{Fe}(\text{OTf})_2$  at 25 °C.

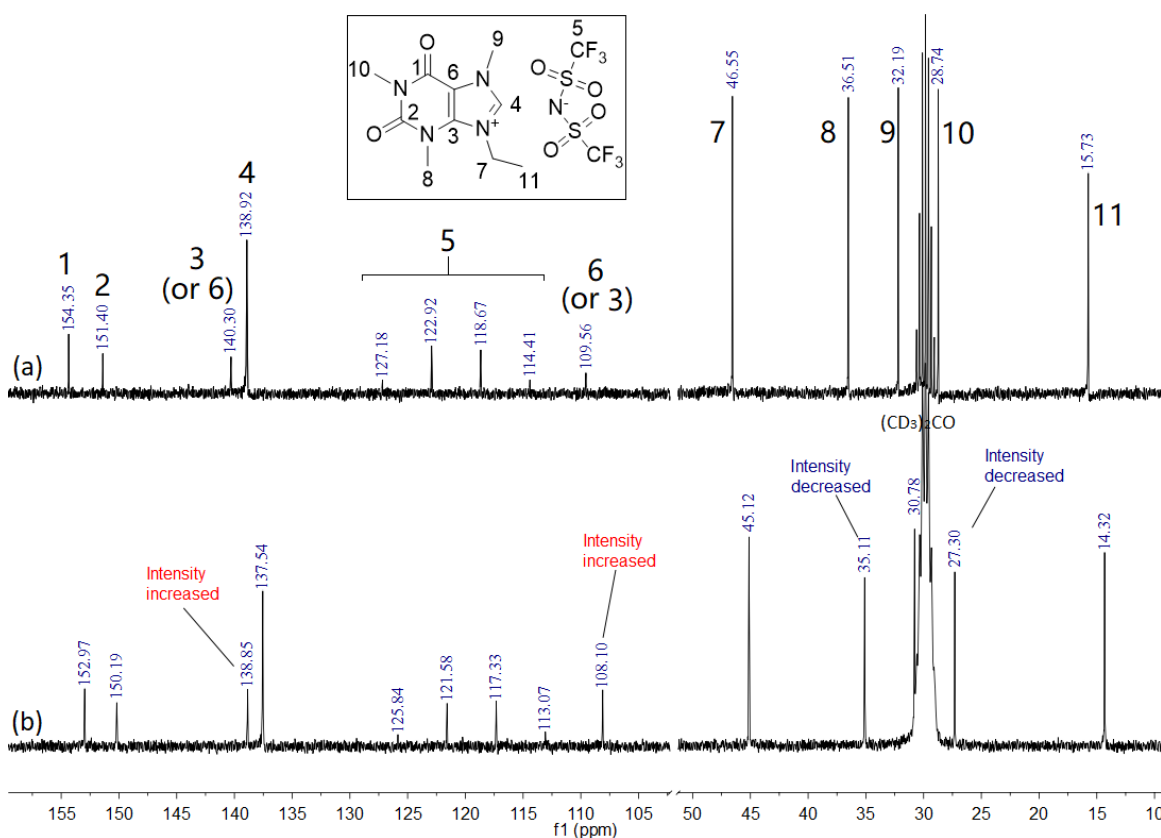

**Figure S4.**  $^{13}\text{C}$  NMR spectra of (a) xanthinium (0.27 mol/L) and (b) xanthinium+ $\text{Fe}(\text{OTf})_2$  (xanthinium = 0.27 mol/mL;  $\text{Fe}(\text{OTf})_2$  = 0.027 mol/mL) in  $(\text{CD}_3)_2\text{CO}$  (75 MHz) shown at 10–50 ppm and 105–155 ppm using solvent signal as reference.

Furthermore, the  $^{19}\text{F}$  NMR spectra were recorded as well (Figure S5). The  $^{19}\text{F}$  NMR signals for  $\text{NTf}_2^-$  of xanthinium and  $\text{OTf}^-$  of  $\text{Fe}(\text{OTf})_2$  were recorded, and clearly showed at  $-79.99$  ppm and  $-56.91$  ppm (broad peak) respectively. Compared to ionic salts of  $\text{OTf}^-$  ( $^{19}\text{F}$  NMR of  $\text{Ca}(\text{OTf})_2$  and  $\text{Bi}(\text{OTf})_3$  appears at  $-79.24$  ppm and  $-79.00$  ppm,<sup>1</sup> respectively), the signal of pure  $\text{Fe}(\text{OTf})_2$  shifts to much deshielded region, implying that the triflate groups in  $\text{Fe}(\text{OTf})_2$  are more electron-deficient than free ionic  $\text{OTf}^-$ . Thus, the triflate groups in  $\text{Fe}(\text{OTf})_2$  were considered coordinating to  $\text{Fe}(\text{II})$  (donating the electrons to  $\text{Fe}^{2+}$  center) in  $(\text{CD}_3)_2\text{CO}$  without the presence of other ligand. Upon addition of 0.1 equiv. of  $\text{Fe}(\text{OTf})_2$  to xanthinium, the signal of triflate shifted to a much shielded value of  $-73.40$  ppm, closer to the ionic  $\text{OTf}^-$ . This chemical shift was also comparable with the value of unbound  $\text{OTf}^-$  ( $-78.96$  ppm,<sup>2</sup>  $-79.59$  ppm<sup>3</sup> and  $-69.7$  ppm<sup>4</sup>), which was liberated from  $\text{Fe}(\text{OTf})_2$  after the  $\text{Fe}^{2+}$  coordinating to a ligand. For this reason, most of  $\text{Fe}^{2+}$  was considered coordinating to xanthinium when the ratio of xanthinium to  $\text{Fe}(\text{OTf})_2$  was high. After 0.5 equiv. of  $\text{Fe}(\text{OTf})_2$  was added to xanthinium, the signal of triflate was hardly detected due to the broadening of

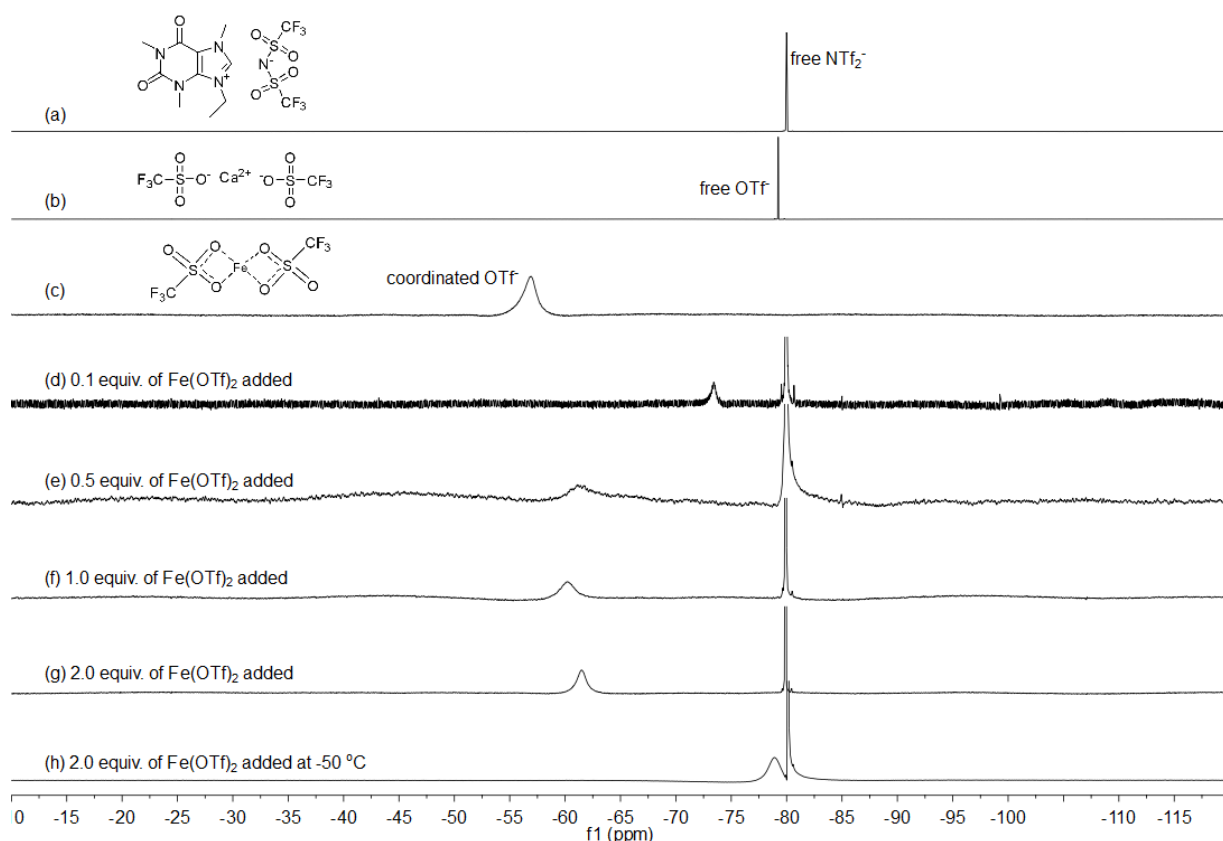

**Figure S5.**  $^{19}\text{F}$  NMR spectra of (a) xanthinium, (b)  $\text{Ca}(\text{OTf})_2$ , (c)  $\text{Fe}(\text{OTf})_2$ , (d)-(f) xanthinium upon addition of different equivalents of  $\text{Fe}(\text{OTf})_2$  at  $25$  °C and (g) xanthinium upon addition of 2.0 equivalents of  $\text{Fe}(\text{OTf})_2$  at  $-50$  °C ( $(\text{CD}_3)_2\text{CO}$ , 376 MHz, 5 mg/mL of xanthinium)

the spectrum. Upon addition of 1.0 equiv. and 2.0 equiv. of  $\text{Fe}(\text{OTf})_2$  to xanthinium, the signals of triflate shifted to  $-60.19$  and  $-61.47$  ppm (Figure S5(f) and S5(g)), respectively, showing an obvious trend closer to  $\text{Fe}(\text{OTf})_2$ . This change was due to the high content of  $\text{Fe}(\text{OTf})_2$  which was not able to fully coordinate to xanthinium. On the other hand, since the  $\text{NTf}_2^-$  is not coordinating (remaining as free anion), the signals of  $\text{NTf}_2^-$  only showed slight changes from  $-79.99$  ppm to  $-79.90$  ppm. In order to slow down the interaction, the  $^{19}\text{F}$  NMR was recorded at  $-50$  °C subsequently (Figure 5(h)). The signal of triflate shifted to  $-78.94$  ppm (close to  $-79$  ppm of ionic  $\text{OTf}^-$ ), indicating that the triflate was “frozen” as a free anion. Although the chemical shift of triflate at  $-50$  °C was close to free  $\text{OTf}^-$ , the shape of peak was still broadened due to the slow dynamic ion exchange.

Finally, high resolution mass spectrometry (HRMS) was used to study the solution of **C1** (Figure S6 and S7). Although the  $\text{Fe}^{2+}$ -containing peak was not detected by HRMS, the

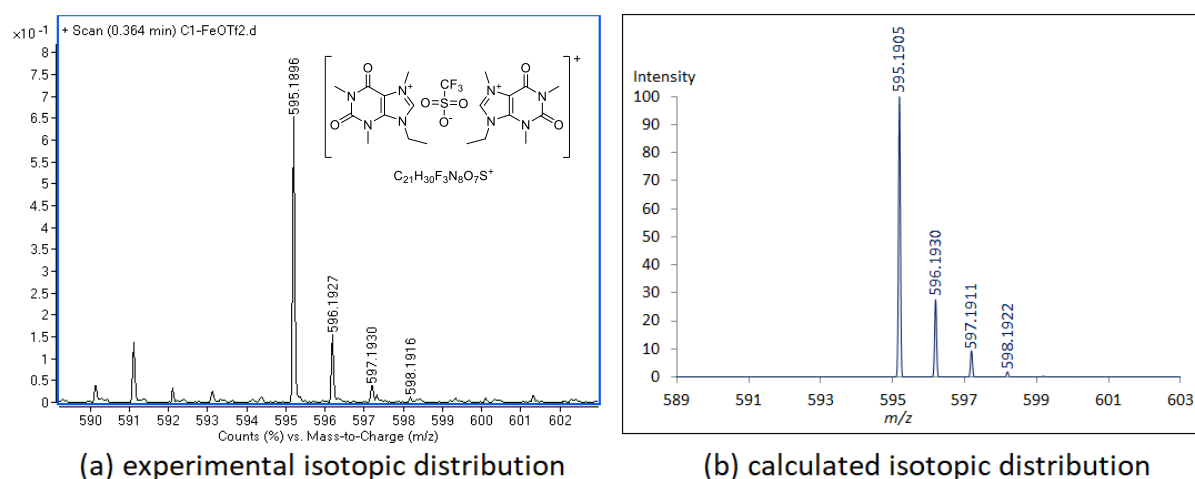

**Figure S6.** HRMS signal of a  $[\text{2xanthinium}+\text{OTf}]^+$  species (ESI-TOF positive ion mode).

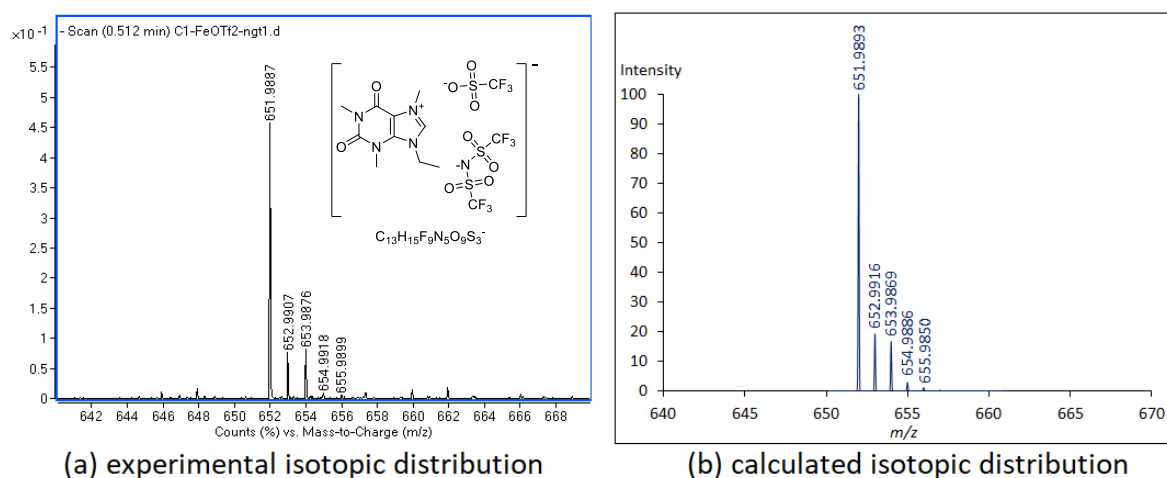

**Figure S7.** HRMS signal of a  $[\text{xanthinium}+\text{OTf}+\text{NTf}_2]^-$  species (ESI-TOF negative ion mode).

signals containing xanthinium species from ion exchange were detected. A  $[2\text{xanthinium}+\text{OTf}]^+$  (found 595.1896, diff. =  $-1.5$  ppm) species was found in positive ion mode (Figure S6). The exact mass and the isotopic distribution confirmed the existence of this species unambiguously. When running in negative ion mode, a  $[\text{xanthinium}+\text{OTf}+\text{NTf}_2]^-$  (found 651.9887, diff. =  $-0.9$  ppm) species was detected, confirming by the exact mass and isotopic distribution (Figure S7). In addition, other species, such as  $[2\text{xanthinium}+\text{NTf}_2]^+$  and  $[\text{xanthinium}+2\text{NTf}_2]^-$  were detected by HRMS as well. According to the HRMS, the ion exchange between xanthinium- $\text{NTf}_2$  and  $\text{Fe}(\text{OTf})_2$  is simply proposed in Scheme S1. During the process of ion exchange, free  $\text{Fe}^{2+}$  and  $\text{OTf}^-$  could be released and transferred between different species. Thus, the Lewis acidic free  $\text{Fe}^{2+}$  could bind with the carbonyl of dienophile, activating the substrates in the D-A reaction.

The detectable changes of FTIR,  $^{13}\text{C}$  and  $^{19}\text{F}$  NMR, and HRMS spectra clearly showed that the interactions between xanthinium and  $\text{Fe}(\text{OTf})_2$  do exist. According to FTIR, and  $^{13}\text{C}$  and  $^{19}\text{F}$  NMR,  $\text{Fe}^{2+}$  could possibly coordinate to the carbonyls of xanthinium; while the HRMS confirmed the ion exchange between xanthinium and  $\text{Fe}(\text{OTf})_2$ .

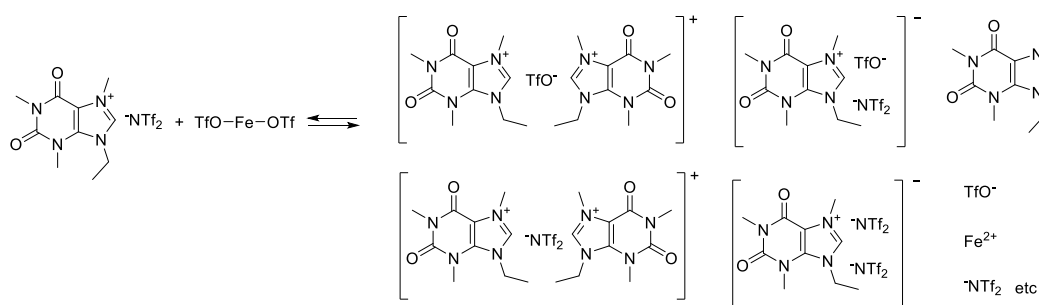

**Scheme S1.** Ion exchange between xanthinium- $\text{NTf}_2$  and  $\text{Fe}(\text{OTf})_2$ .

## 2. $^1\text{H}$ and $^{19}\text{F}$ NMR of C1 before and after the catalytic reactions

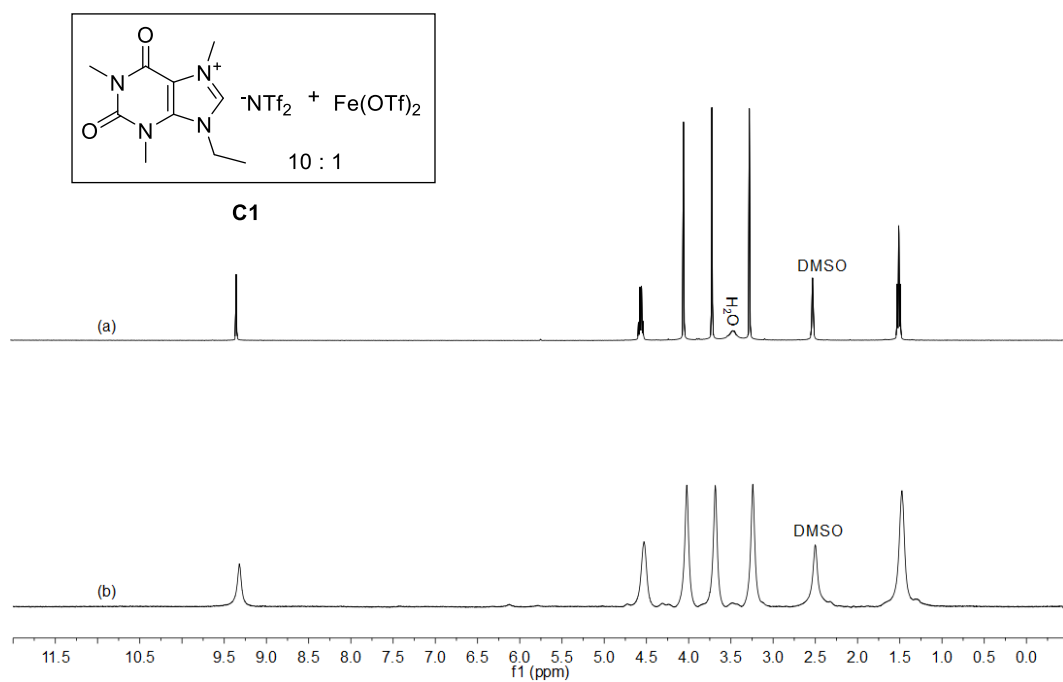

**Figure S8.**  $^1\text{H}$  NMR of C1: (a) before and (b) after catalytic reactions (400 MHz,  $(\text{CD}_3)_2\text{SO}$ )

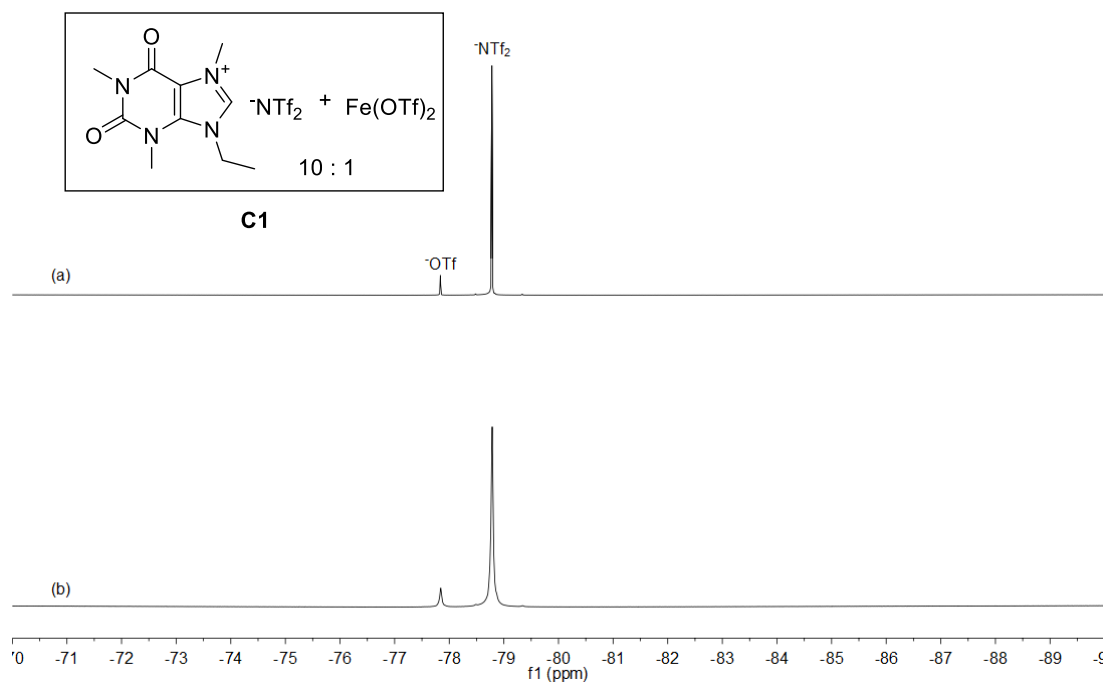

**Figure S9.**  $^{19}\text{F}$  NMR of C1: (a) before and (b) after catalytic reactions (376 MHz,  $(\text{CD}_3)_2\text{SO}$ )



### 3. Comparison between C1–C4

The change of Gibbs free energy and Mulliken charge of Fe(II) or Fe(III) after the ion exchange were calculated at B3LYP/6-31G/LANL2DZ level in gas phase to obtain an over-simplified evaluation for **C1–C4**. The results are shown in Scheme S2.

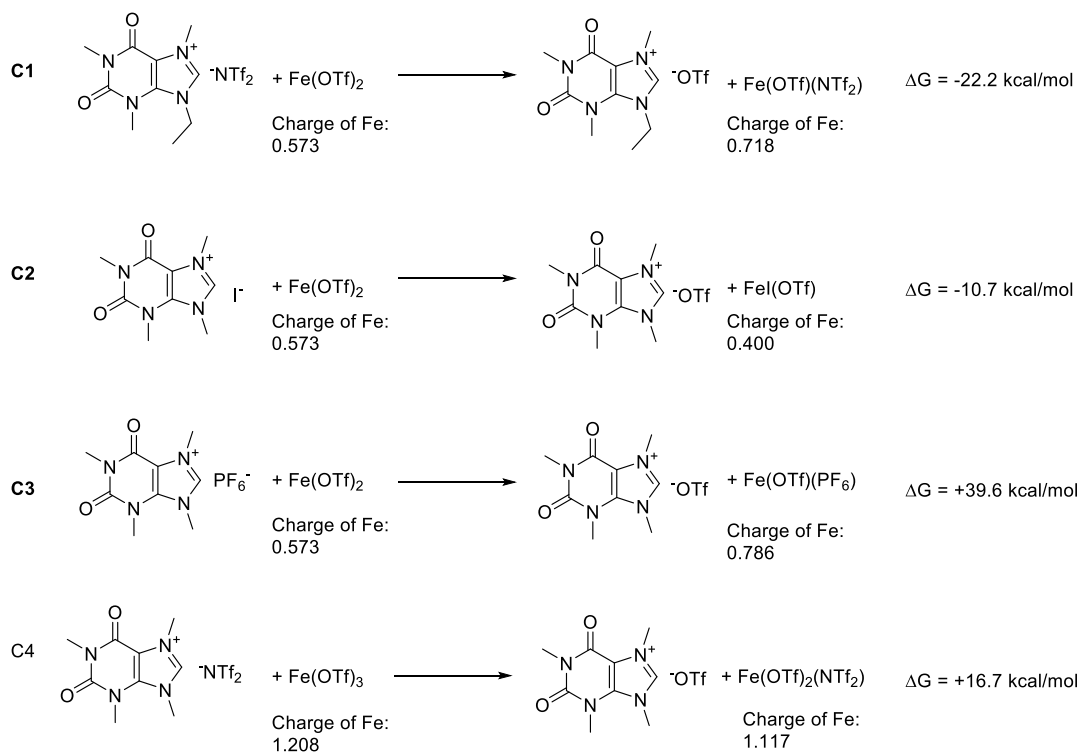

**Scheme S2.** Ion exchange between xanthiniums and Fe salts. Gibbs energies and Mulliken charges were calculated at B3LYP/6-31G/LANL2DZ level.

According to the calculations, the ion exchange in **C1** is favored ( $\Delta G = -22.2$  kcal/mol) which is supported by the <sup>19</sup>F NMR change and HRMS. After ion exchange, the Mulliken charge of Fe(OTf)<sub>2</sub> (0.573) increases to 0.718 of Fe(OTf)(NTf<sub>2</sub>), which indicates a more Lewis acidic Fe(II) salt. Thus, **C1** resulted in excellent yields on catalyzing the D-A reactions (main text Table 1, entry 6). In **C2**, the ion exchange is expected to be favored ( $\Delta G = -10.7$  kcal/mol), and this is consistent to the coordinating nature of I<sup>-</sup> (easiness of binding to transition metals). However, the ion exchange in **C2** is expected to result in less Lewis acidic Fe(OTf) (Mulliken charge drops from 0.573 to 0.400). Thus, **C2** afforded low yields of products (33% yield, main text Table 1, entry 7). In **C3**, the ion exchange is expected not to be favourable ( $\Delta G = +39.6$  kcal/mol), and in fact the reversed reaction was spontaneous and already known in the literature.<sup>5</sup> Thus, the xanthinium and Fe(OTf)<sub>2</sub> in **C3** remained essentially unchanged, and the yield using **C3** (55% yield, Table 1, entry 8) is lower than

the yield using  $\text{Fe}(\text{OTf})_2$  alone (81% yield, Table 1, entry 11) by 26%. In **C4**, the ion exchange is expected to be not favourable ( $\Delta G = +16.7$  kcal/mol) either. Since  $\text{Fe}(\text{OTf})_3$  is very Lewis acidic (1.208 of Mulliken charge), excellent yield (97% yield, Table 1, entry 9) was still obtained, which is comparable to the yield using **C1**.

#### 4. Copies of $^1\text{H}$ NMR and $^{13}\text{C}$ NMR spectra of the products

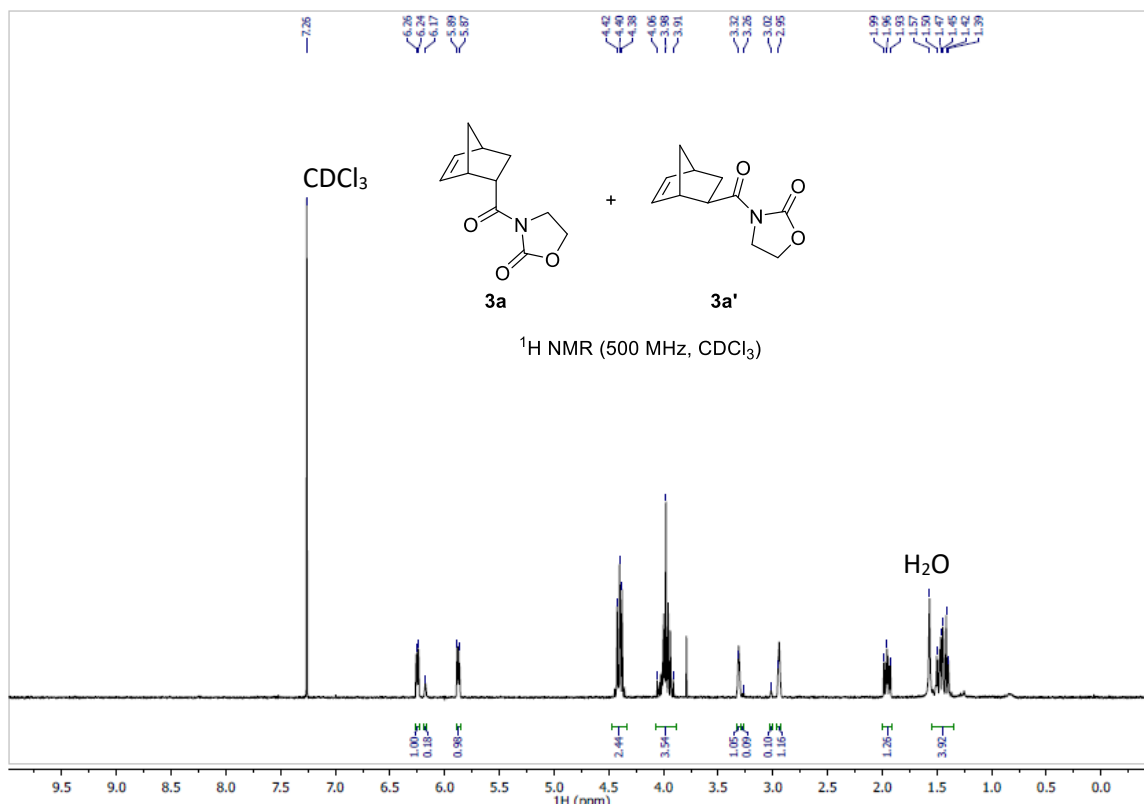

$^1\text{H}$  NMR of **3a+3a'** (500 MHz,  $\text{CDCl}_3$ , mixture of *endo/exo* products)

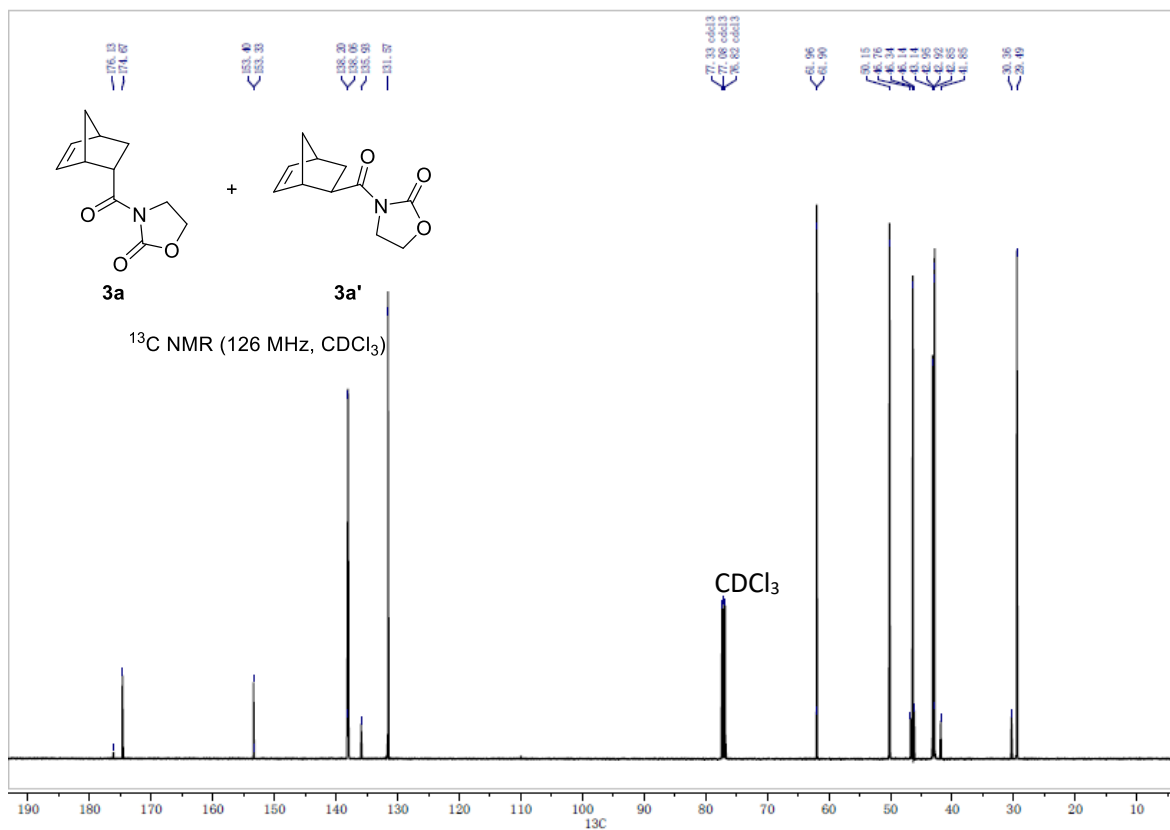

$^{13}\text{C}$  NMR of **3a+3a'** (126 MHz,  $\text{CDCl}_3$ , mixture of *endo/exo* products)

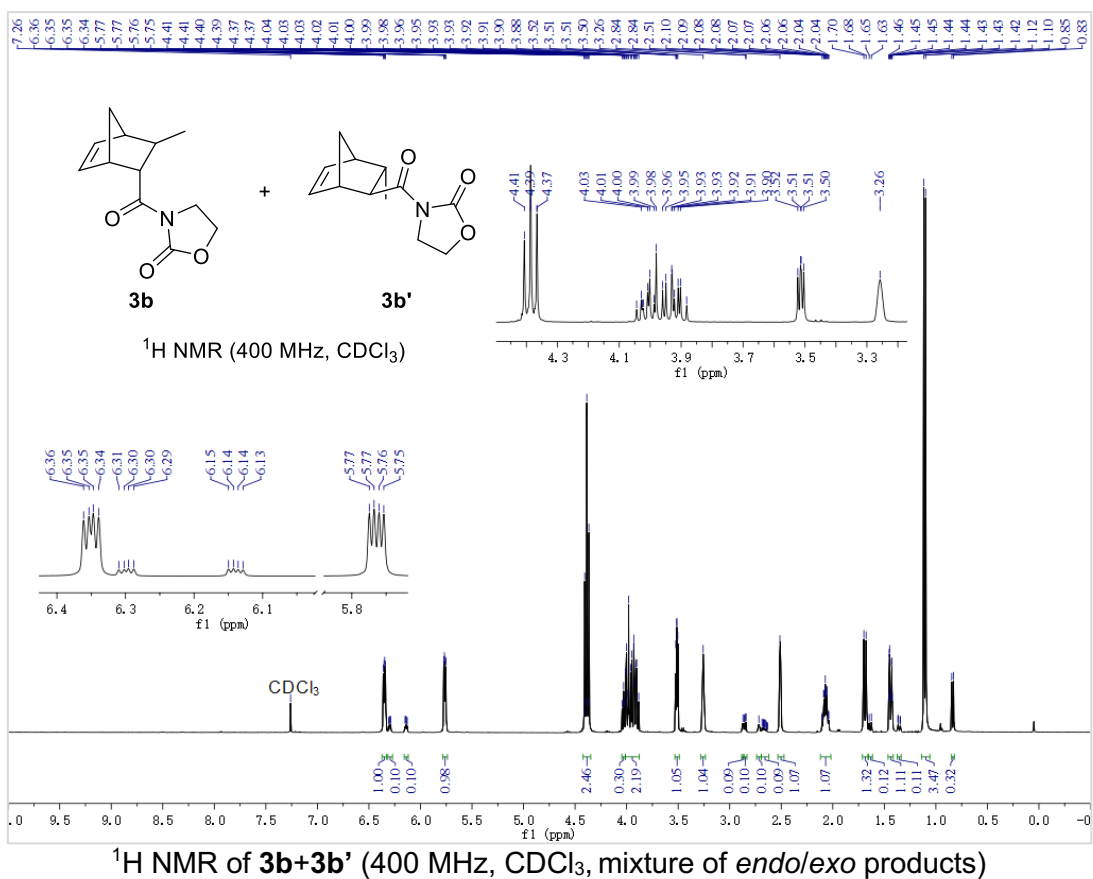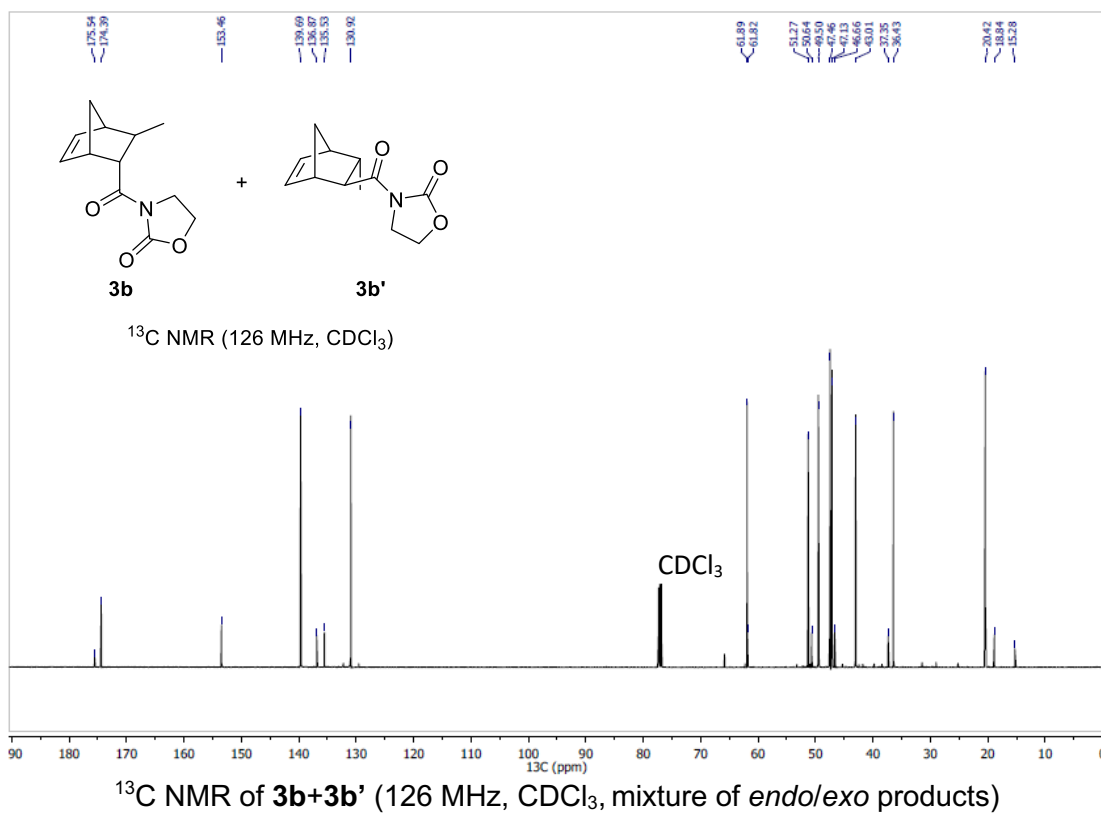

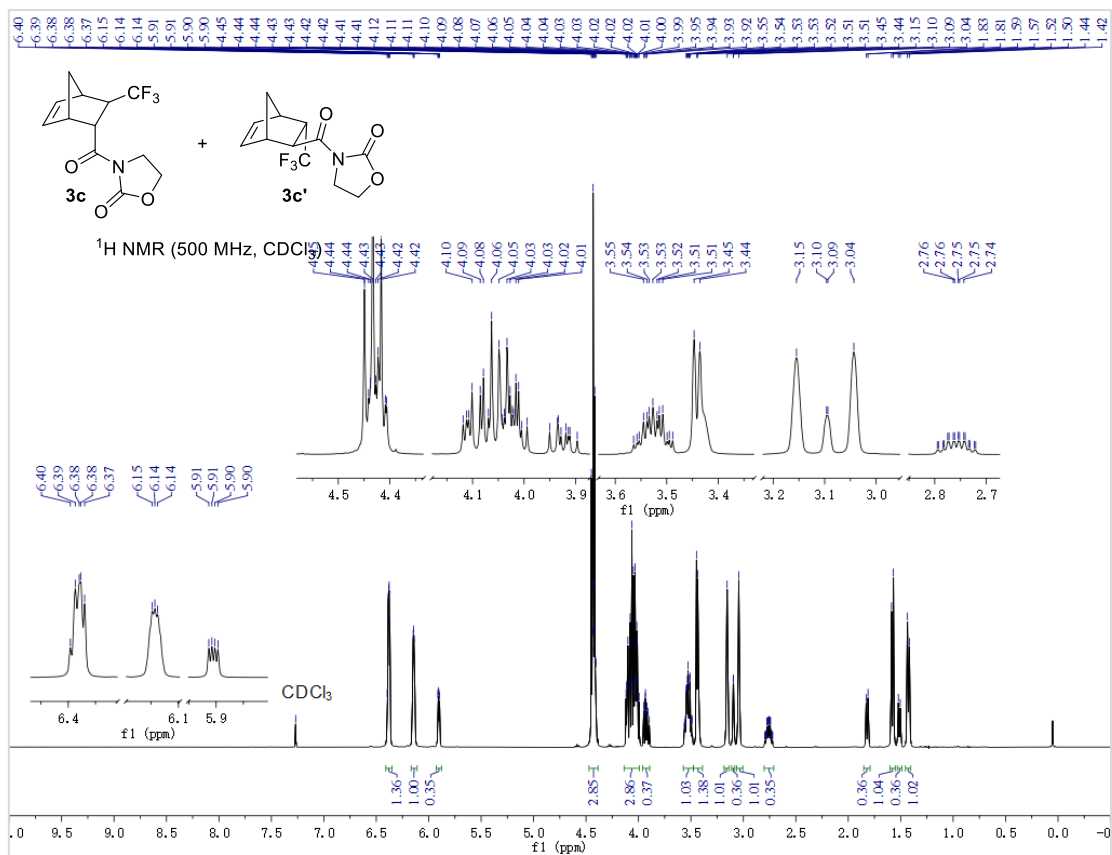

**<sup>1</sup>H NMR of **3c**+**3c'** (500 MHz, CDCl<sub>3</sub>, mixture of *endo/exo* products)**

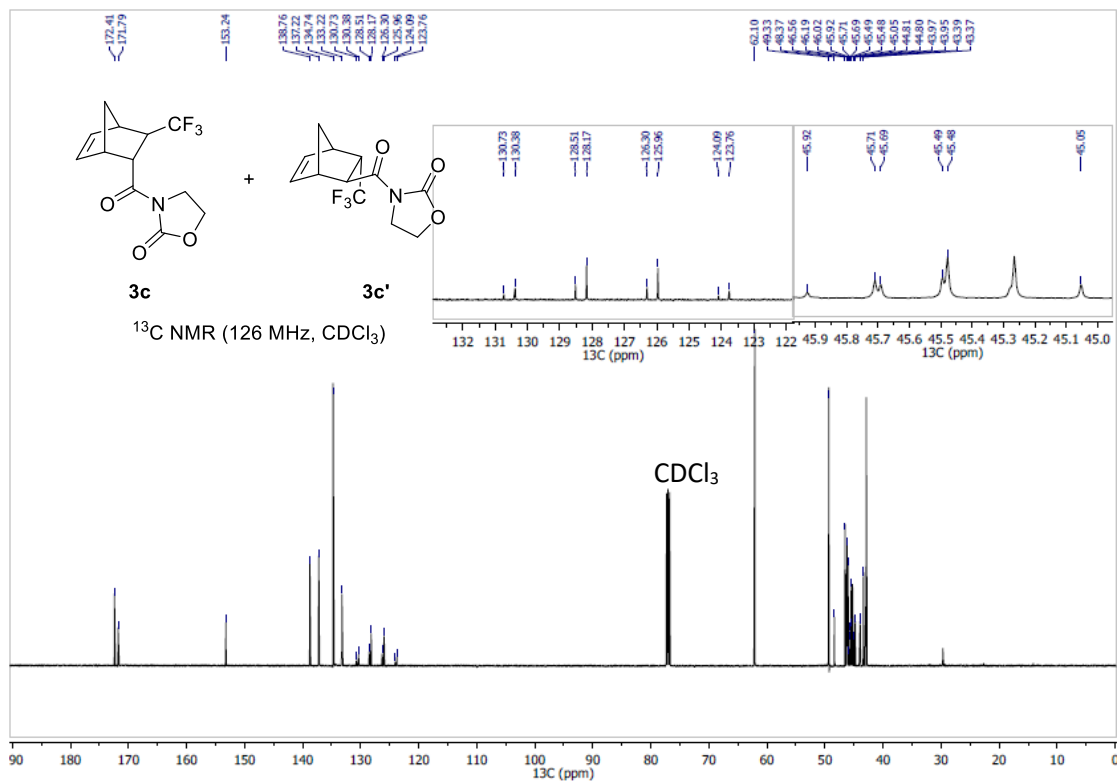

**<sup>13</sup>C NMR of **3c**+**3c'** (126 MHz, CDCl<sub>3</sub>, mixture of *endo/exo* products)**

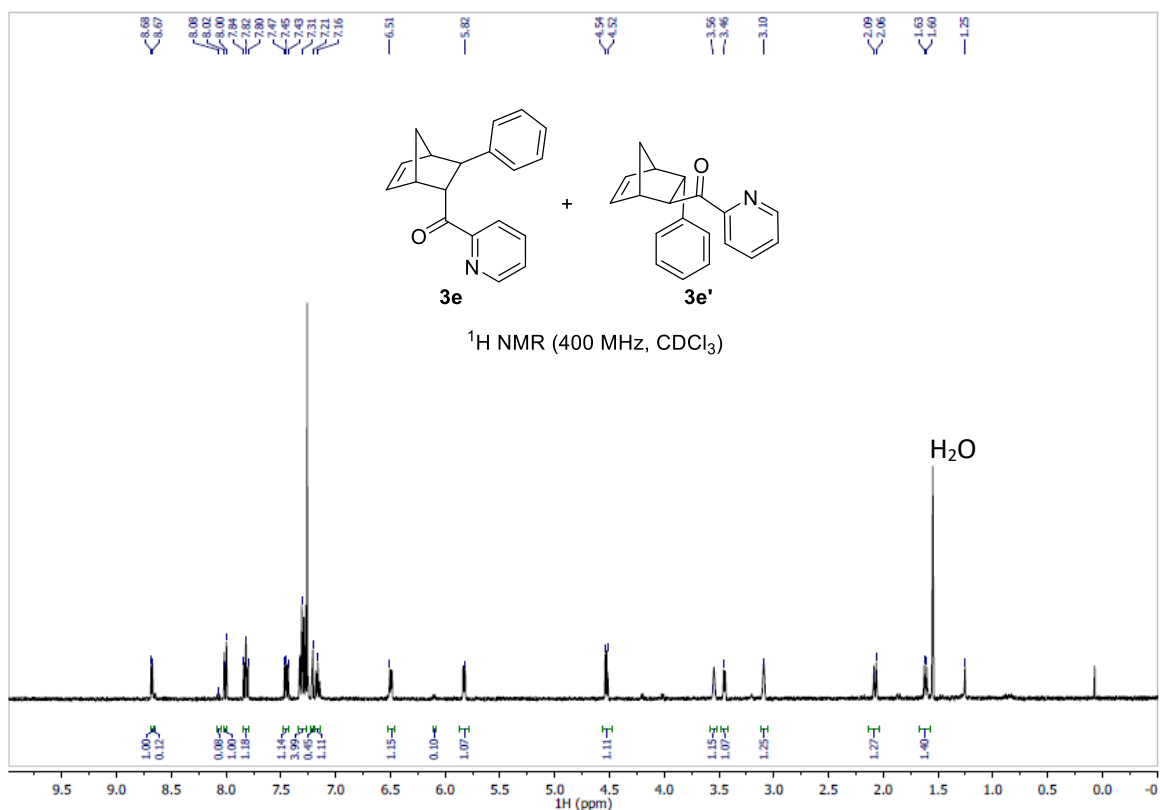

**<sup>1</sup>H NMR of 3e+3e' (400 MHz, CDCl<sub>3</sub>, mixture of *endo/exo* products)**

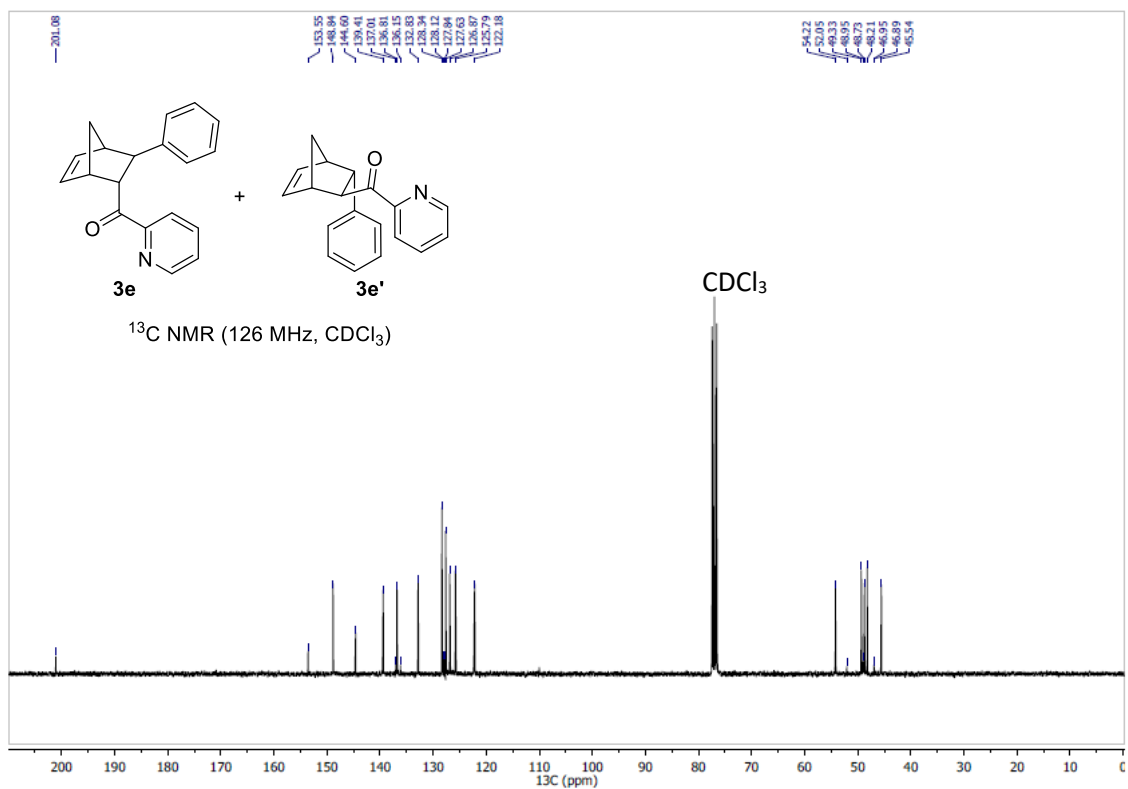

**<sup>13</sup>C NMR of 3e+3e' (126 MHz, CDCl<sub>3</sub>, mixture of *endo/exo* products)**



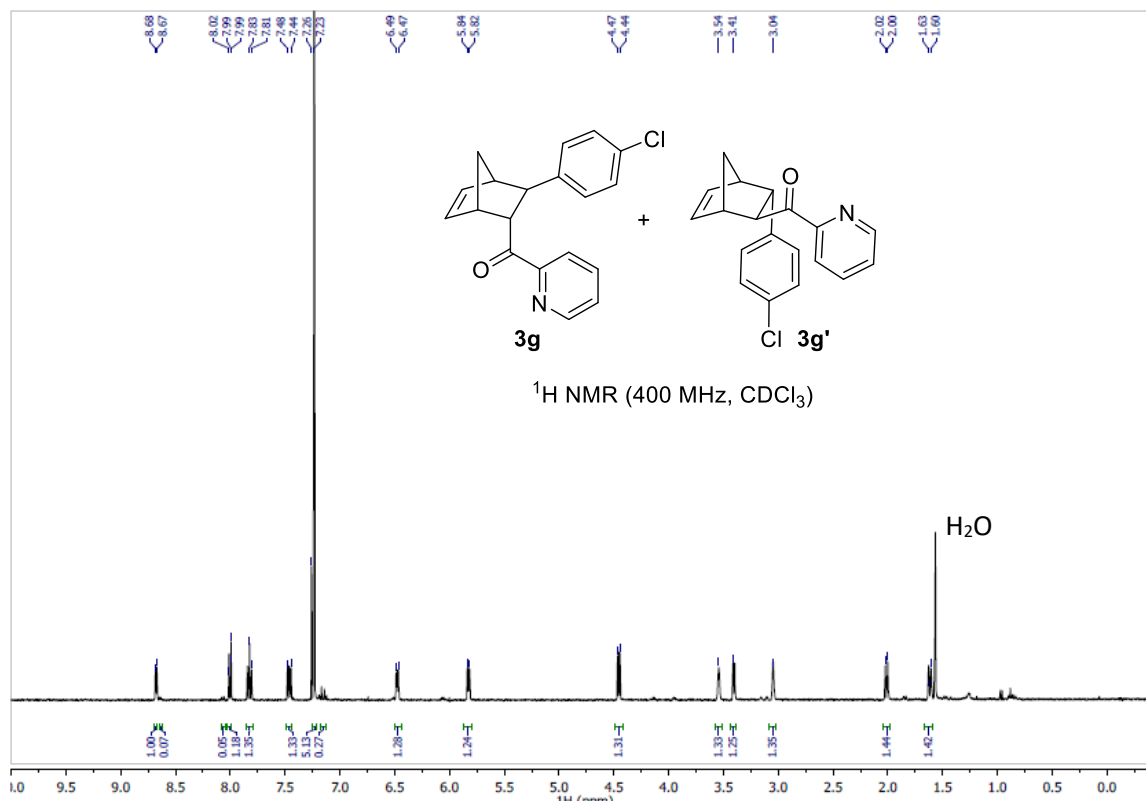

$^1\text{H NMR}$  of **3g+3g'** (400 MHz,  $\text{CDCl}_3$ , mixture of *endo/exo* products)

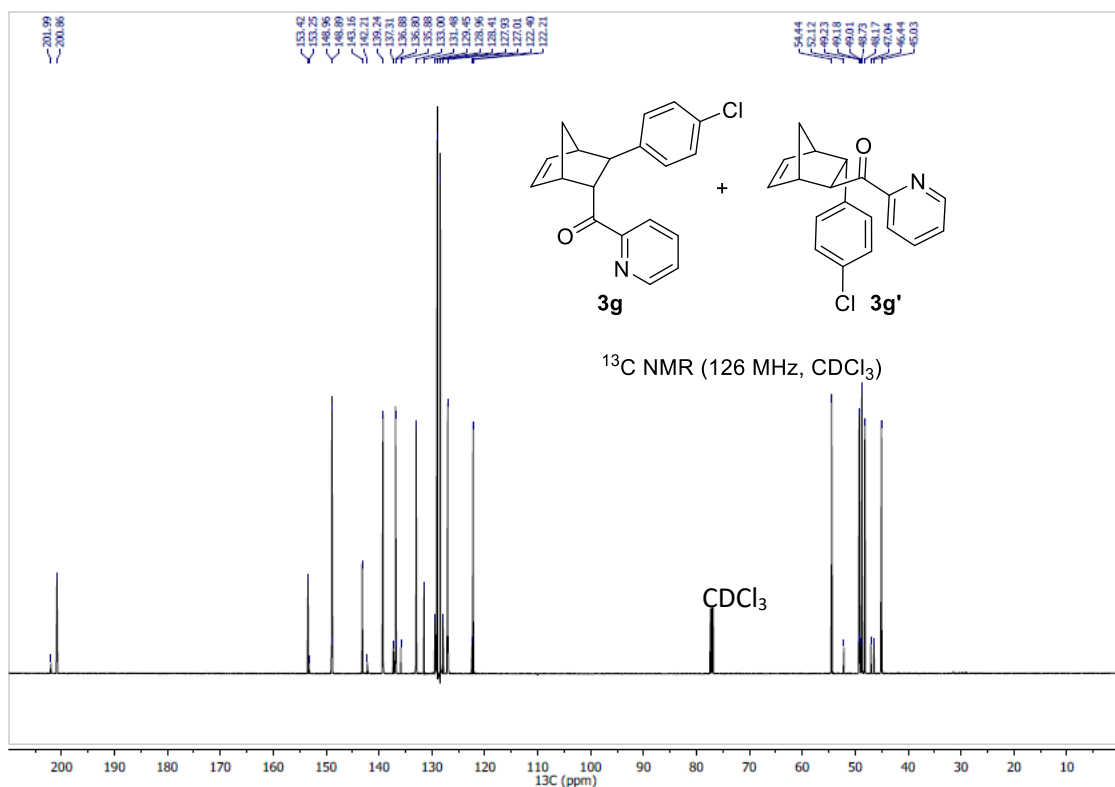

$^{13}\text{C NMR}$  of **3g+3g'** (126 MHz,  $\text{CDCl}_3$ , mixture of *endo/exo* products)



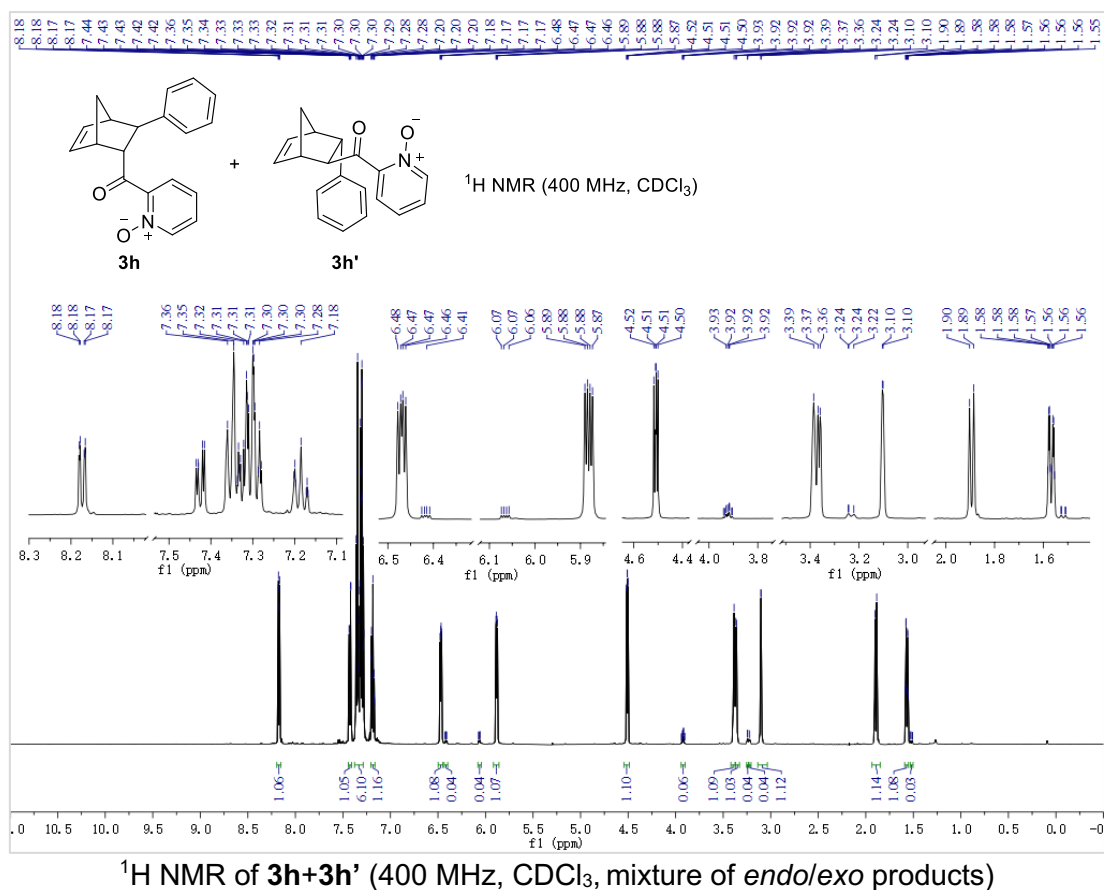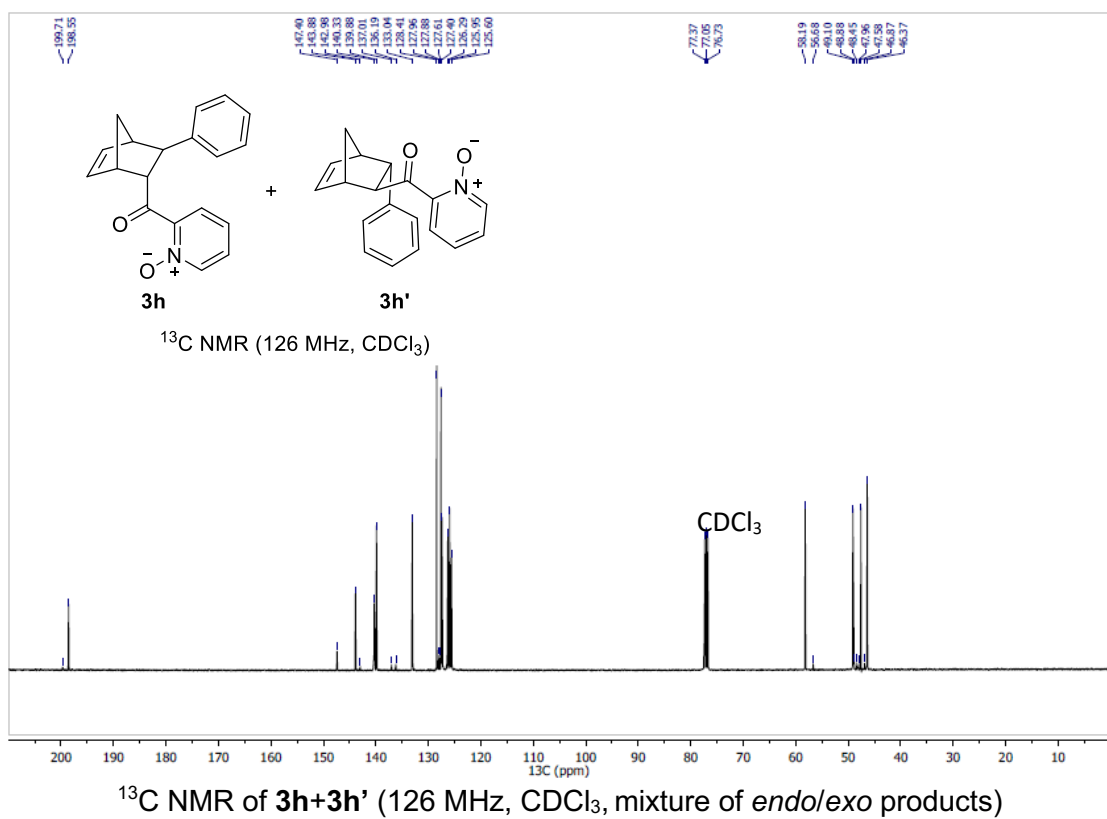

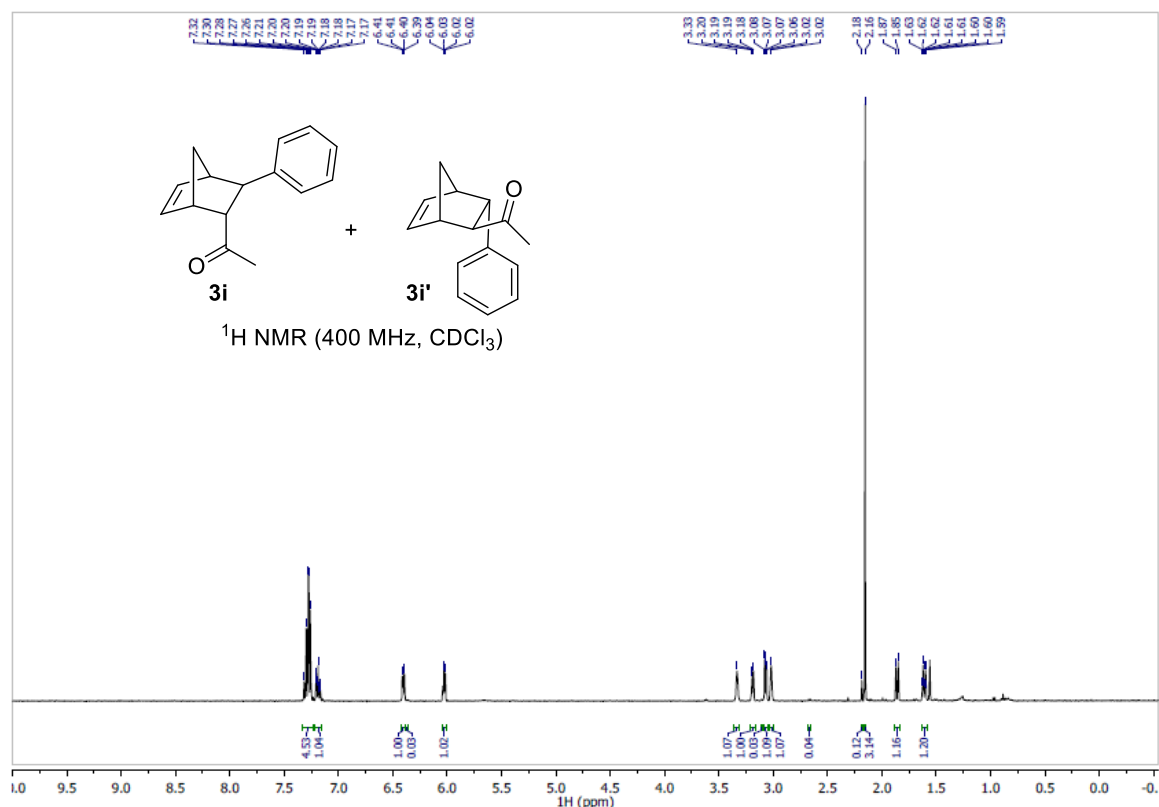

**<sup>1</sup>H NMR of **3i+3i'** (400 MHz, CDCl<sub>3</sub>, mixture of *endo/exo* products)**

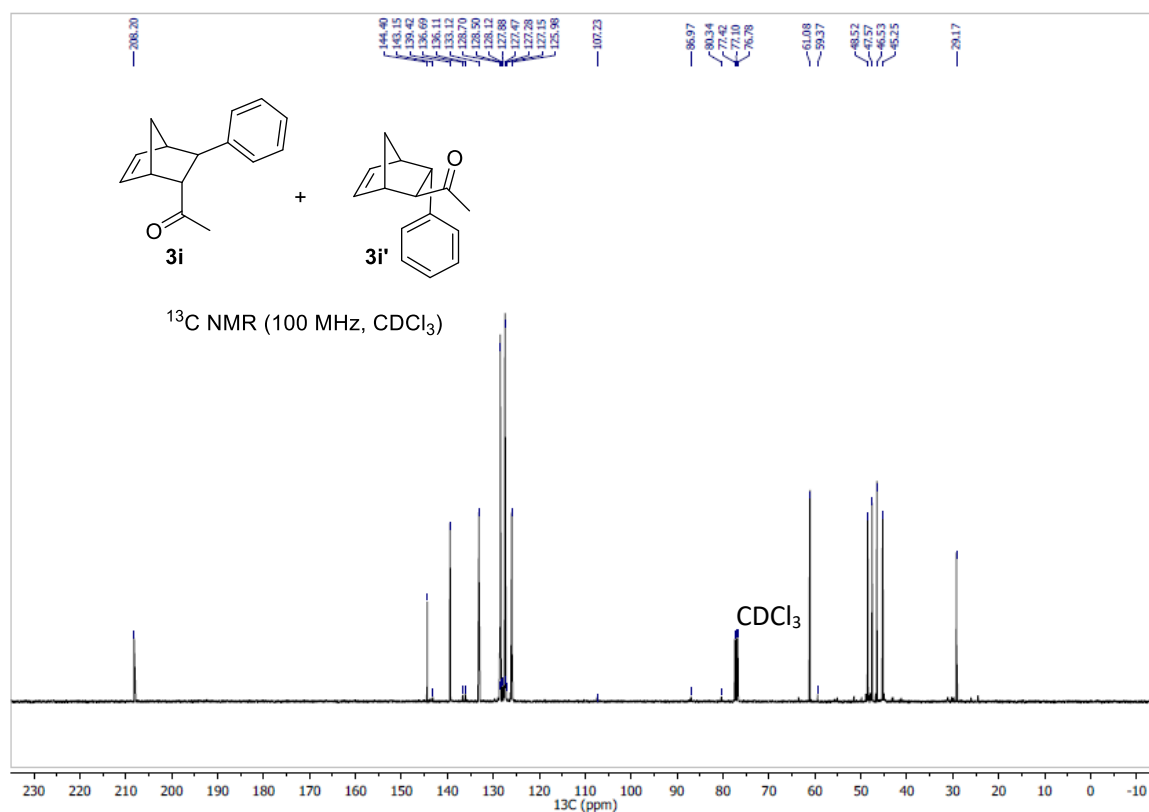

**<sup>13</sup>C NMR of **3i+3i'** (100 MHz, CDCl<sub>3</sub>, mixture of *endo/exo* products)**

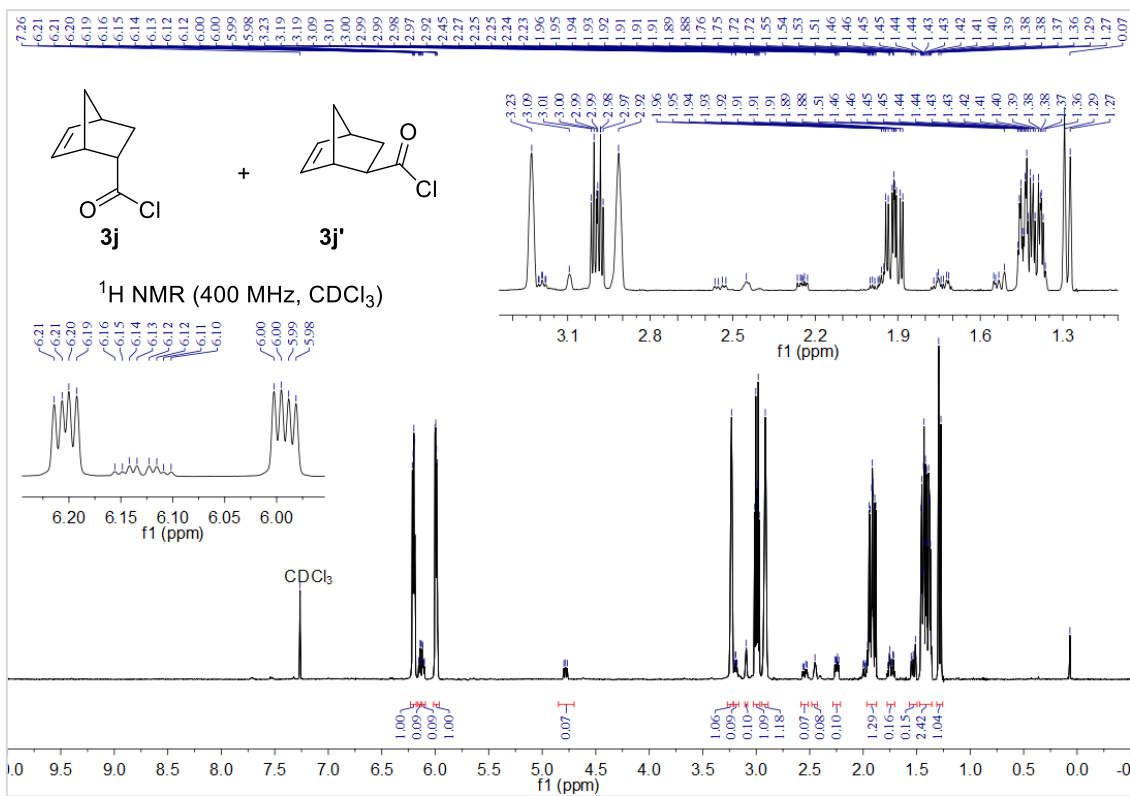

<sup>1</sup>H NMR of **3j+3j'** (400 MHz, CDCl<sub>3</sub>, mixture of *endo/exo* products)

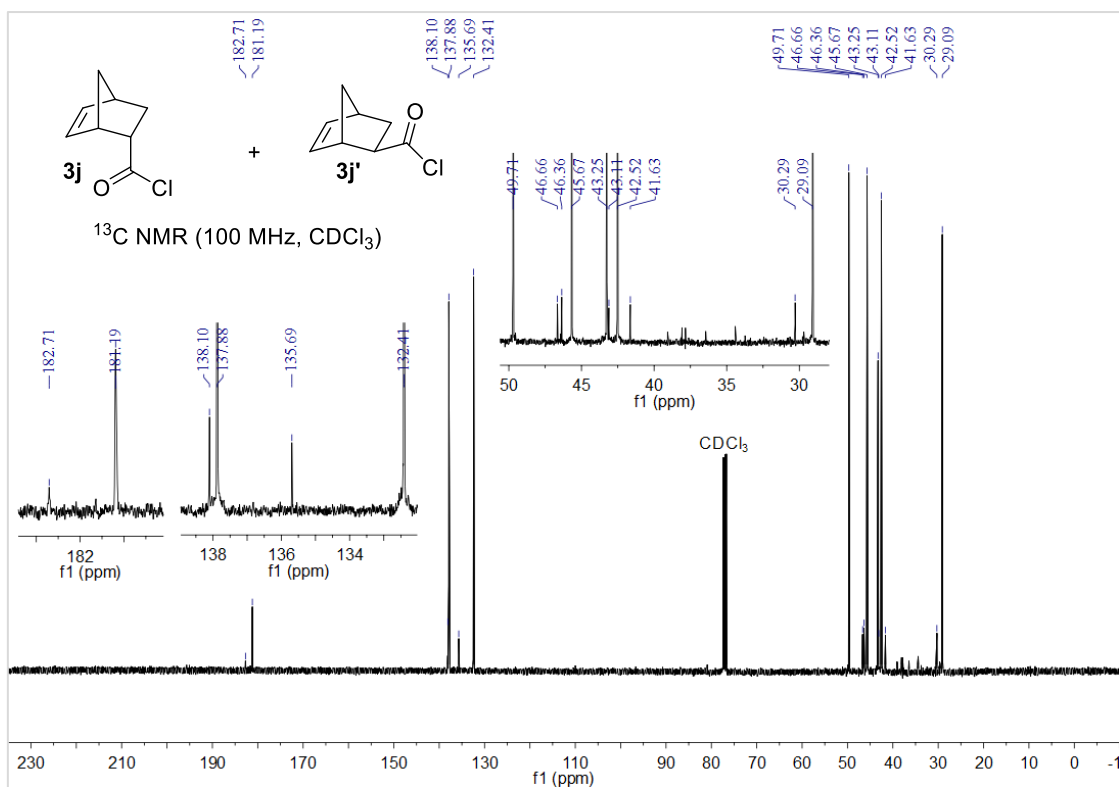

<sup>13</sup>C NMR of **3j+3j'** (100 MHz, CDCl<sub>3</sub>, mixture of *endo/exo* products)

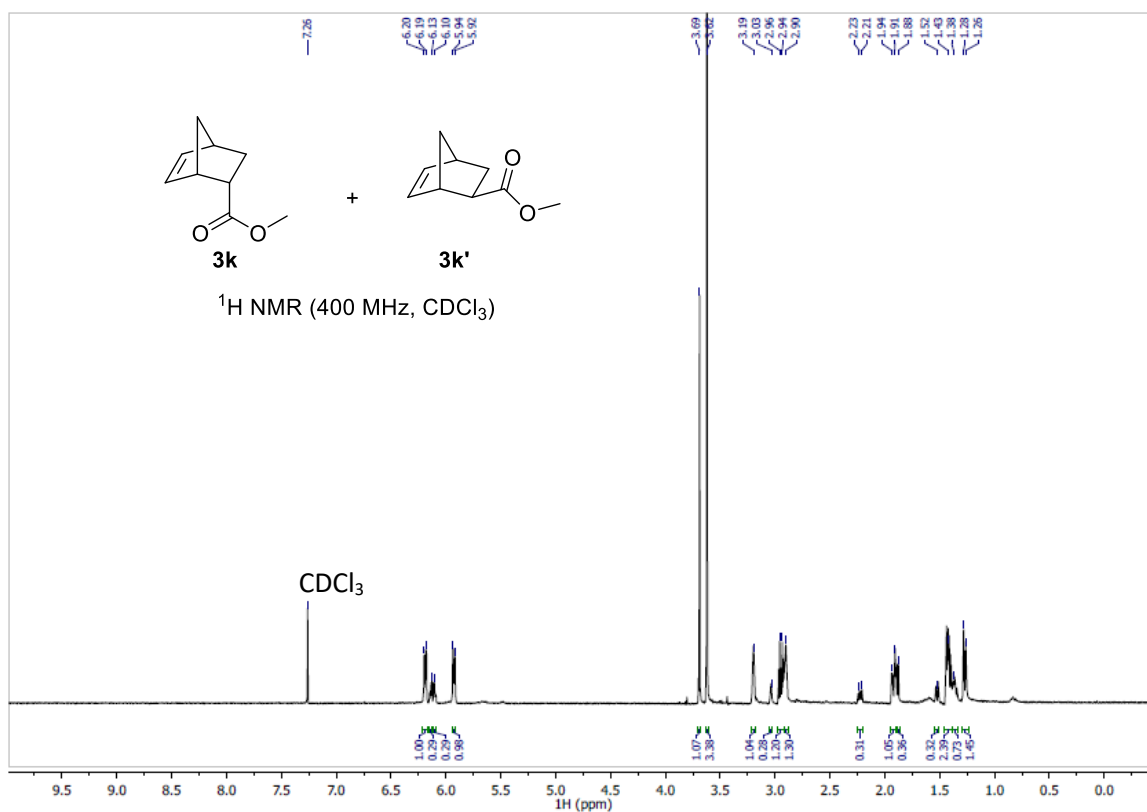

<sup>1</sup>H NMR of **3k+3k'** (400 MHz, CDCl<sub>3</sub>, mixture of *endo/exo* products)

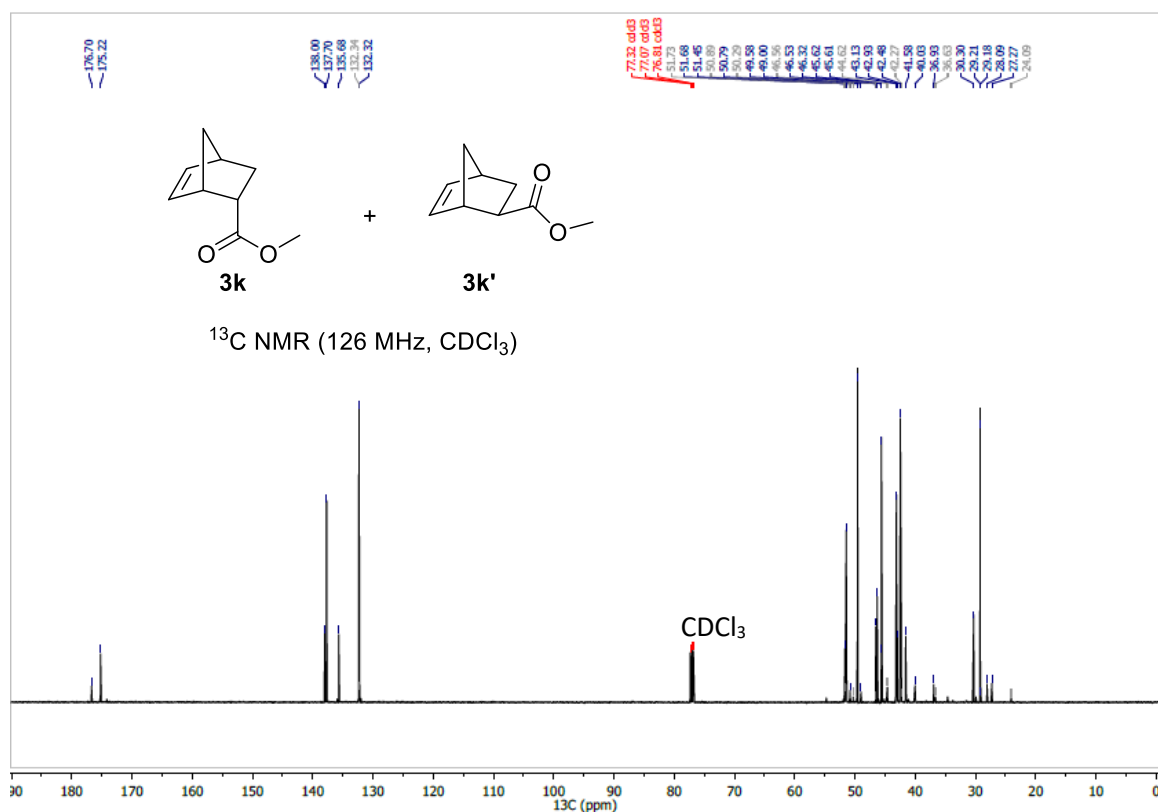

<sup>13</sup>C NMR of **3k+3k'** (126 MHz, CDCl<sub>3</sub>, mixture of *endo/exo* products)

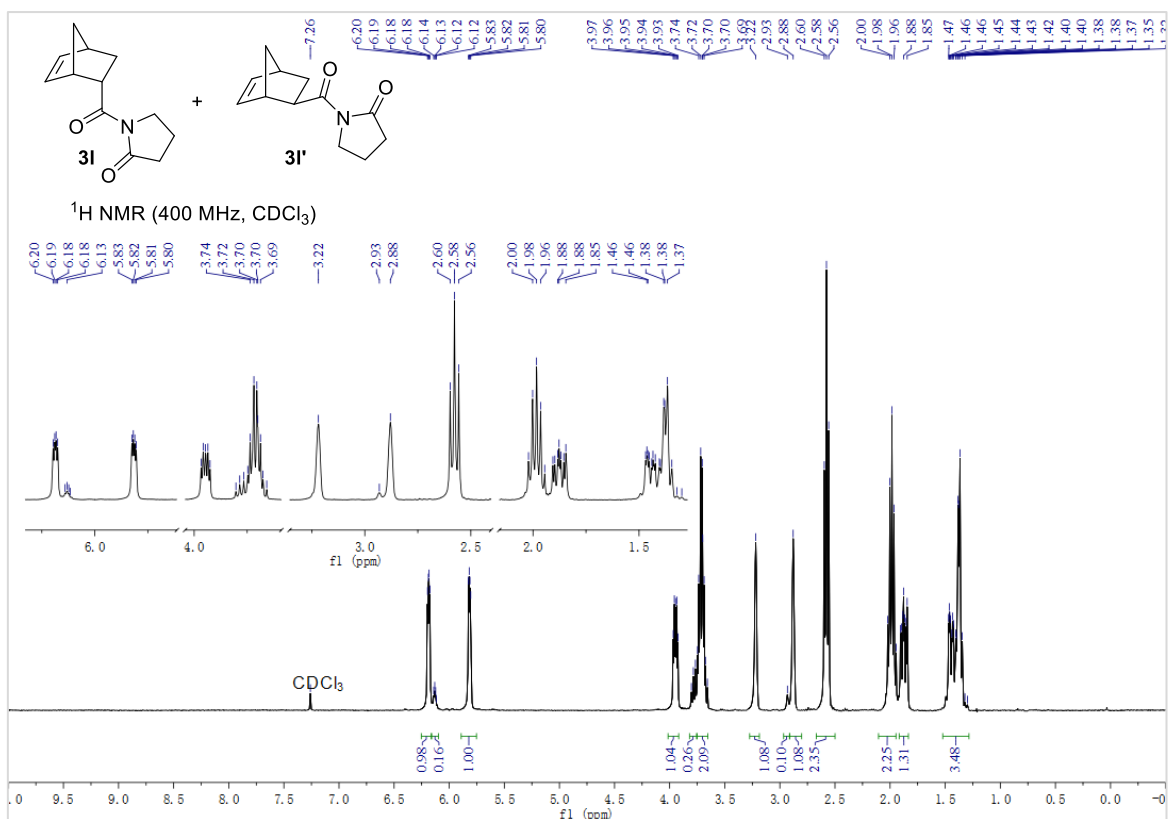

**<sup>1</sup>H NMR of **3I+3I'** (400 MHz, CDCl<sub>3</sub>, mixture of *endo/exo* products)**

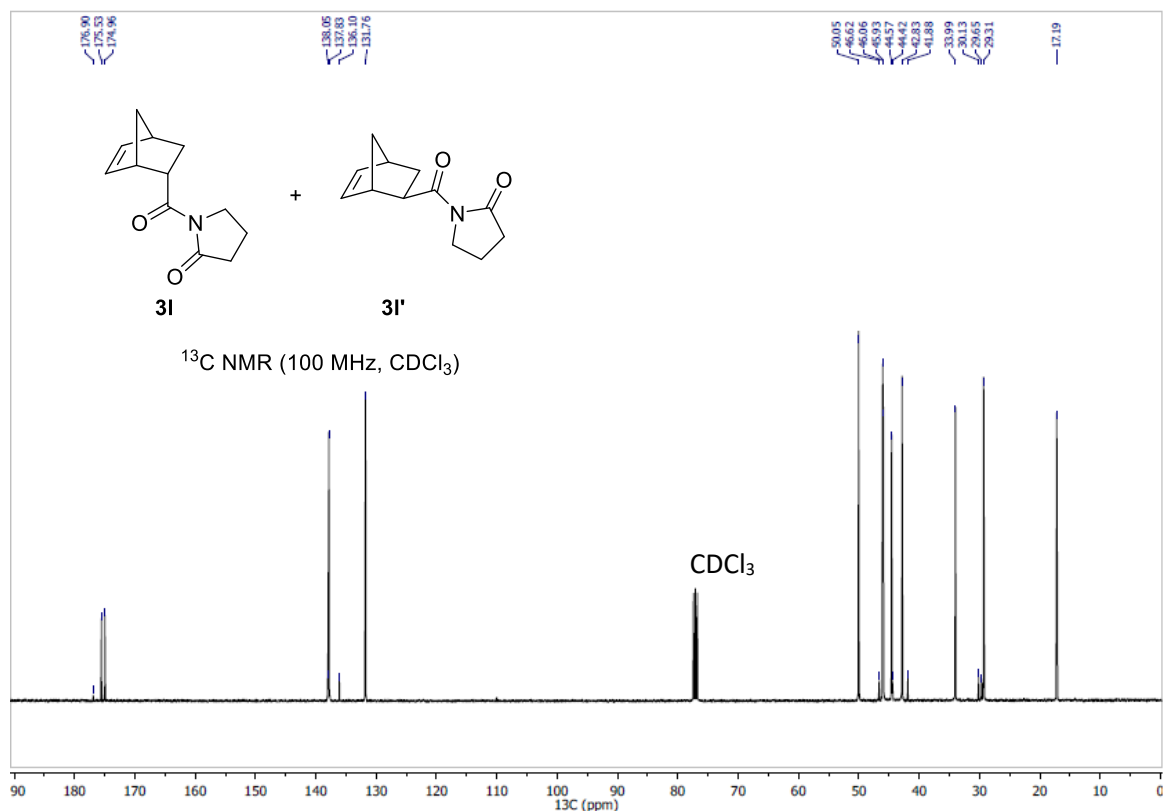

**<sup>13</sup>C NMR of **3I+3I'** (100 MHz, CDCl<sub>3</sub>, mixture of *endo/exo* products)**

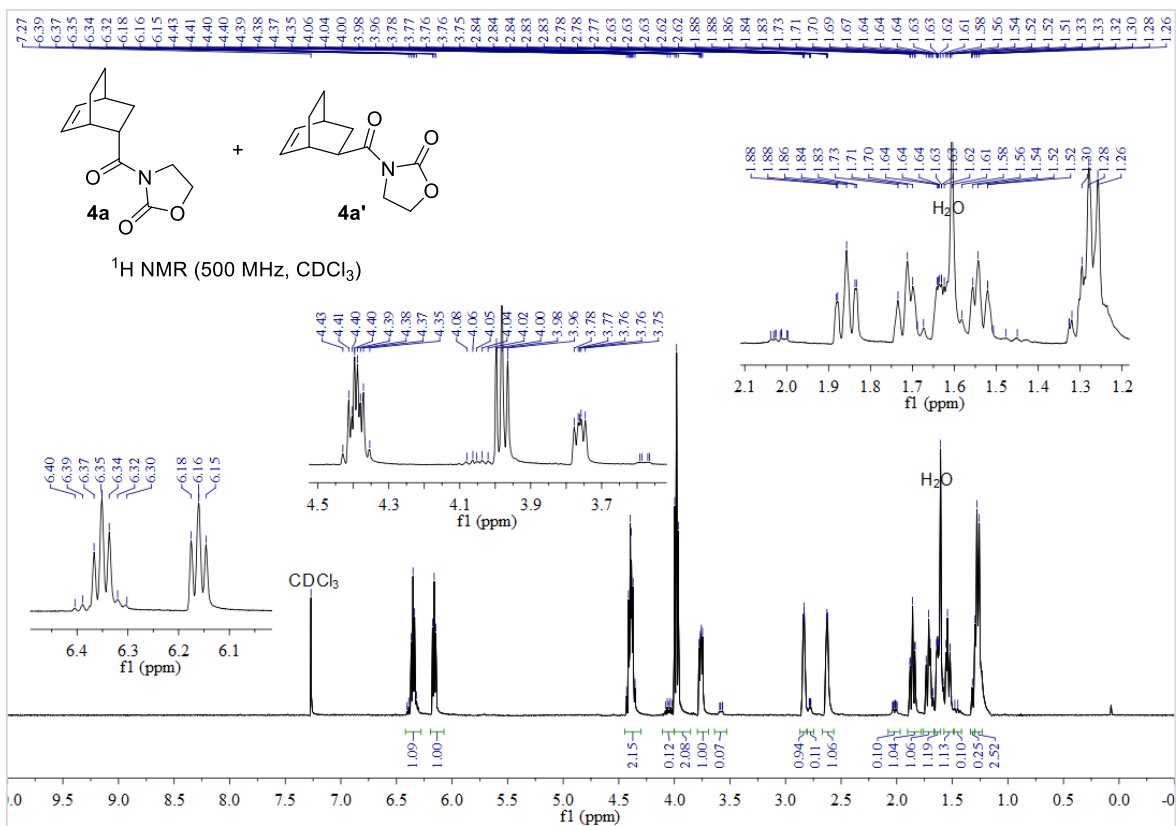

**<sup>1</sup>H NMR of **4a+4a'** (500 MHz, CDCl<sub>3</sub>, mixture of *endo/exo* products)**

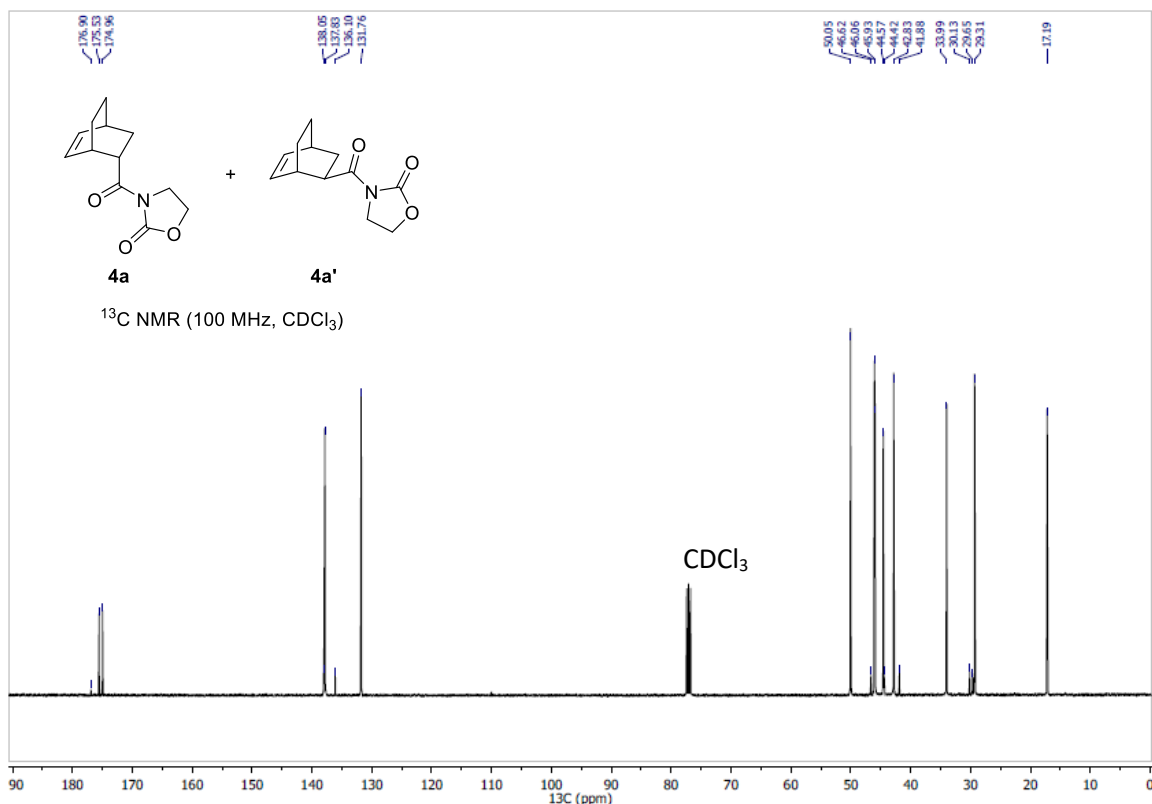

**<sup>13</sup>C NMR of **4a+4a'** (100 MHz, CDCl<sub>3</sub>, mixture of *endo/exo* products)**

## 5. References

- 1 Pinto, R. M. A.; Salvador, J. A. R.; Le Roux, C. *Catal. Commun.* 2008, **9**, 465-469.
- 2 Grommet, A. B.; Bolliger, J. L.; Browne, C.; Nitschke, J. R. *Angew. Chem. Int. Ed.* 2015, **54**, 15100-15104.
- 3 Matson, E. M.; Bertke, J. A.; Fout, A. R. *Inorg. Chem.* 2014, **53**, 4450-4458.
- 4 Blakesley, D. W.; Payne, S. C.; Hagen, K. S. *Inorg. Chem.* 2000, **39**, 1979-1989.
- 5 Kascatan-Nebioglu, A.; Panzner, M. J.; Garrison, J. C.; Tessier, C. A.; Youngs, W. J., *Organometallics* 2004, **23**, 1928-1931.
